# Supplementary material for: Photooxidation of A2E by Blue Light Regulates Heme Oxygenase 1 Expression via NF-κB and Lysine Methyltransferase 2A in ARPE-19 Cells
Source: MDPI journal article supplement (doi:10.3390/life12111698), 2022-10-25
Supplement: s1 [file s1]

## Supplementary Materials

**Supplementary Table S1.** Primer sequences used for RT-qPCR

| Gene                            | Forward               | Reverse                  |
|---------------------------------|-----------------------|--------------------------|
| <i>HMOX1</i>                    | CCTGGAAGACACCCTAATG   | AAACACAAGACACAACATCT     |
| <i>HSP90AA1</i>                 | GTTGGTCCTGTGCGGTCAC   | TGGGCAATTTCTGCCTGAA      |
| <i>DUSP5</i>                    | GTCCTCACCTCGCTACTC    | GGGCTCTCTCACTCTCAAT      |
| <i>INHBA</i>                    | TGTGATGGCAAGGTCAACT   | ATGATAGCCAGAGGGAGCAA     |
| <i>CXCL8</i>                    | CTGGCCGTGGCTCTCTTG    | CCTTGGCAAACTGCACCTT      |
| <i>TRIB1</i>                    | TTCAAGCAGATTGTCTCC GC | AGTGGTGTTGAGGATCTCAG     |
| <i>MLL1</i>                     | GAGGACCCCGGATTAAACAT  | GGAGCAAGAGGTTTCAGCATC    |
| <i>MLL2</i>                     | GTGCAGCAGAAGATGGTGAA  | GCACAATGCTGTCAGGAGAA     |
| <i>HMOX1 promoter (–250 bp)</i> | CAGAGCCTGCAGCTTCTCAGA | GGAAACAAAGTCTGGCCATAGGAC |
| <i>HMOX1 enhancer (– 4 kb)</i>  | CAGTGCCTCCTCAGCTTCTC  | CTCGGTGGATTGCAACATTA     |
| <i>18S</i>                      | GAGGATGAGGTGGAACGTGT  | TCTTCAGTCGCTCCAGGTCT     |

**Supplementary Table S2.** Sequences of siRNAs

| Name      | Sequence                                                                |
|-----------|-------------------------------------------------------------------------|
| siNS      | UUCUCCGAACGUGUCACGUdTdT (sense)<br>ACGUGACACGUUCGGAGAAdTdT (anti-sense) |
| siMLL1    | GAUUCGAACACCCAGUUAdTdT (sense)<br>AUAACUGGGUGUUCGAAUCdTdT (anti-sense)  |
| siMLL1(2) | GCACUGUUAACAUAUCCACdTdT (sense)<br>GUGGAAUGUUUAACAGUGCdTdT (anti-sense) |
| siMLL2    | CCCACCUGAAUCAUACCUdTdT (sense)<br>AGGCGAUGAUUCAGGUGGGdTdT (anti-sense)  |
